# Supplementary material for: Pyriproxyfen is metabolized by P450s associated with pyrethroid resistance in An. gambiae
Source: PubMed Central journal article supplement — Insect Biochem Mol Biol. 2016 Nov;78:50–7. doi: 10.1016/j.ibmb.2016.09.001 (PMC6399515; doi:10.1016/j.ibmb.2016.09.001), 2016-11
Supplement: mmc1.pdf [file mmc1.pdf]

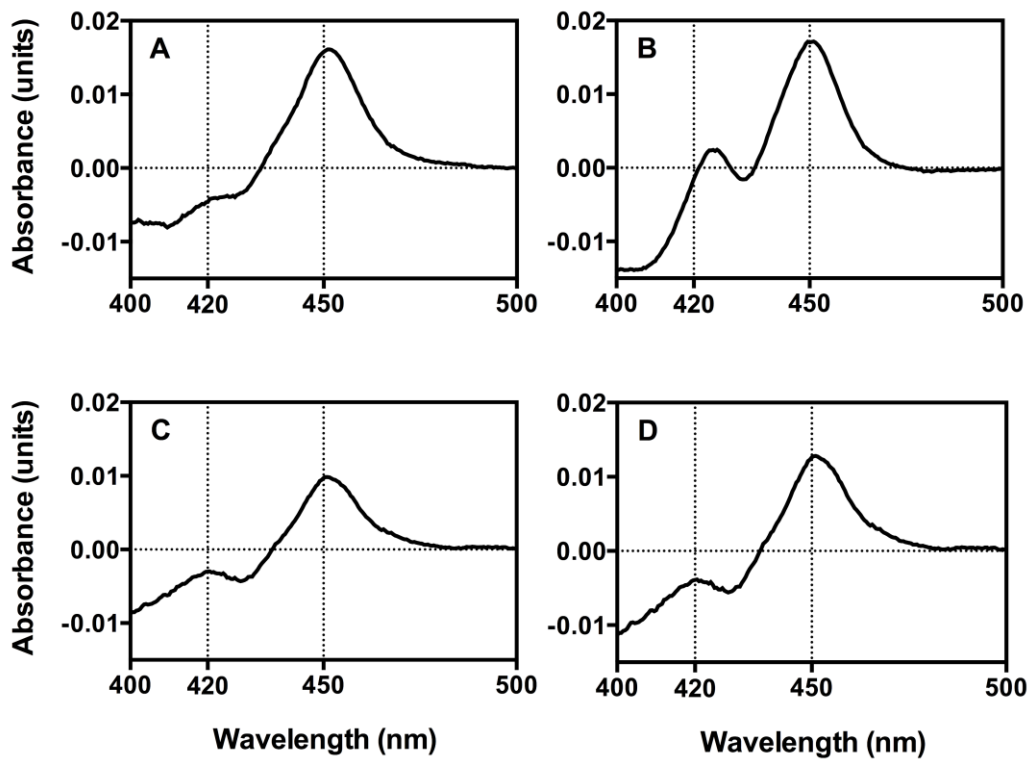

**Figure S1: Carbon monoxide difference spectra of bacterial membranes expressing *An. gambiae* P450s.** Typical CO-reduced spectra of bacterial membranes with (A), CYP6P2; (B), CYP6P4; (C), CYP6P5 and (D), CYP9J5; vertical dashed lines at 420 and 450 nm.
