# Supplementary material for: Pyriproxyfen is metabolized by P450s associated with pyrethroid resistance in An. gambiae
Source: PubMed Central journal article supplement — Insect Biochem Mol Biol. 2016 Nov;78:50–7. doi: 10.1016/j.ibmb.2016.09.001 (PMC6399515; doi:10.1016/j.ibmb.2016.09.001), 2016-11
Supplement: mmc2.pdf [file mmc2.pdf]

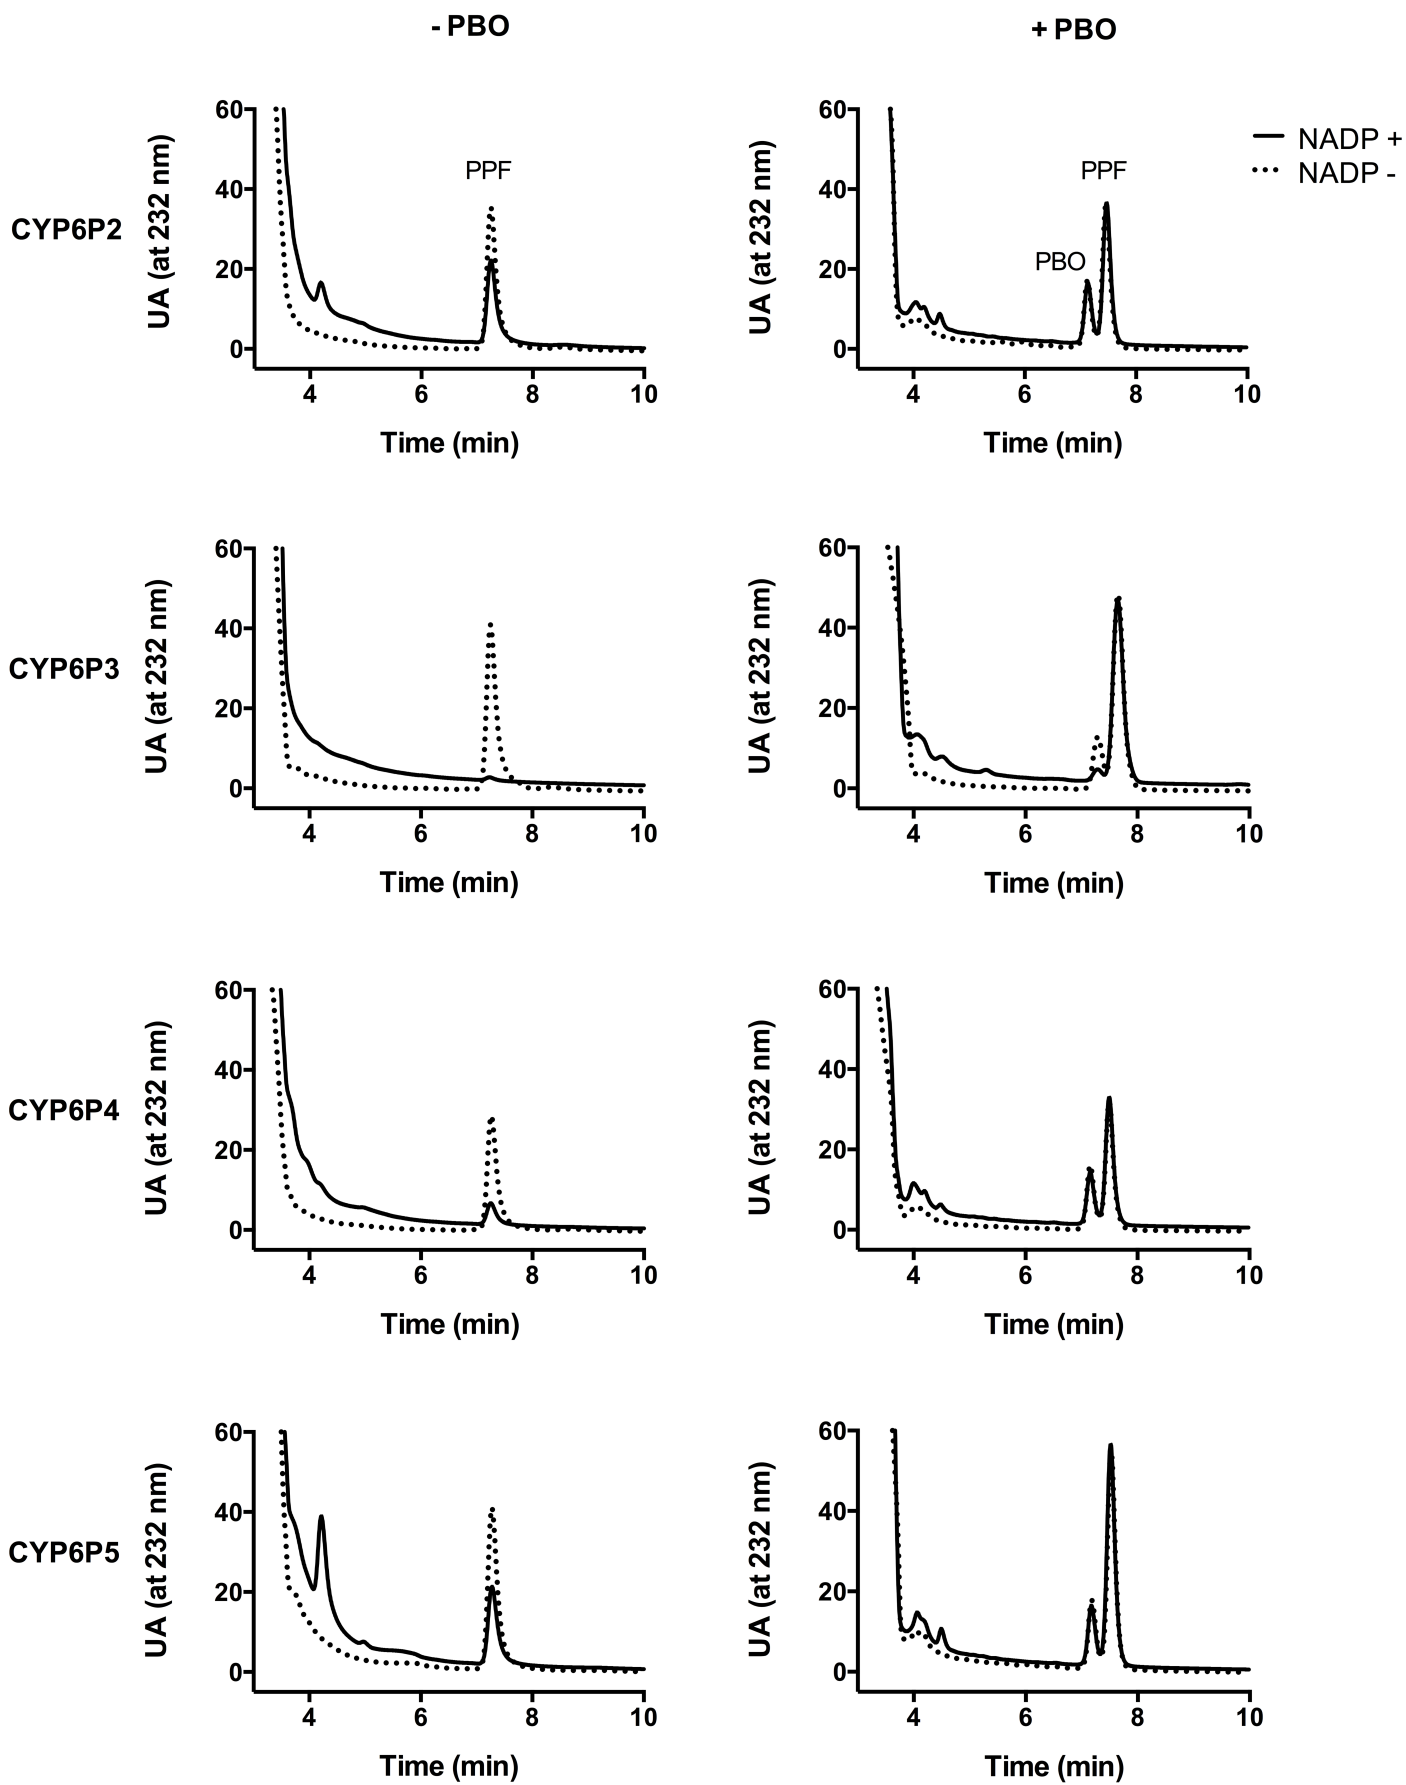

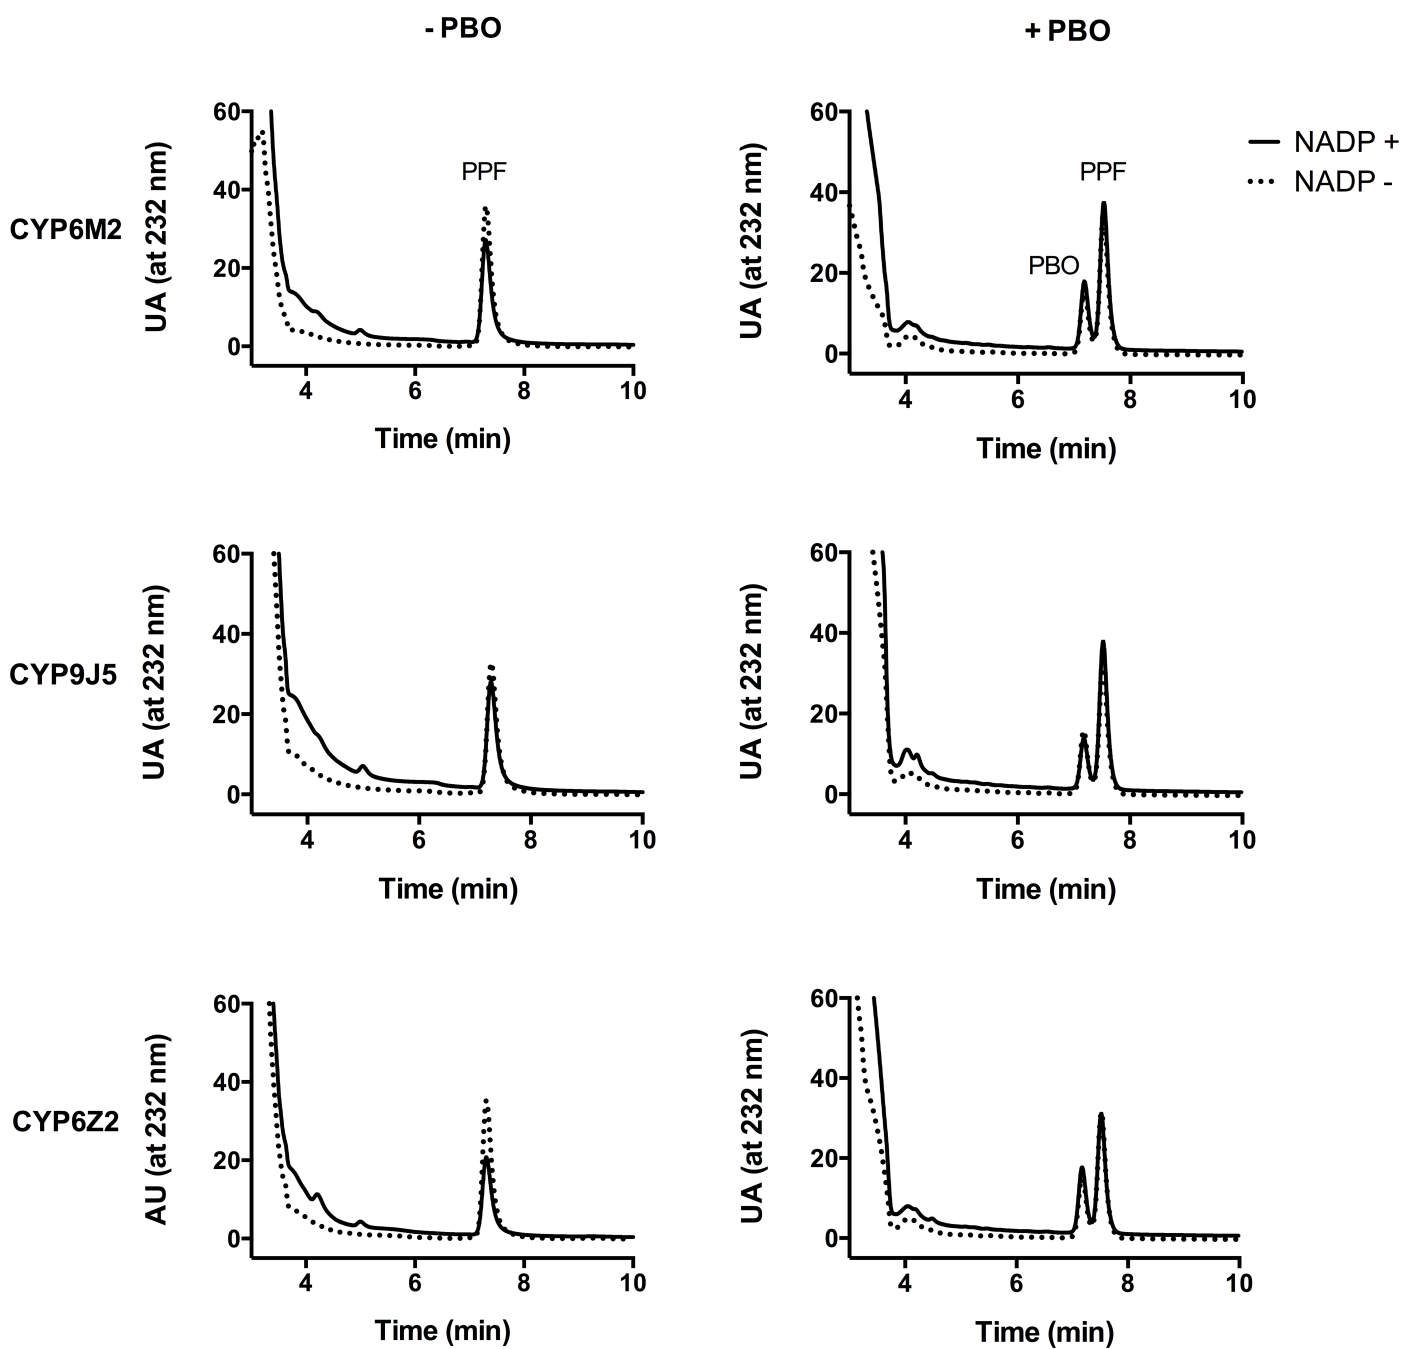

**Figure S2: HPLC chromatograms of pyriproxyfen metabolism.**

Chromatograms show the pyriproxyfen depletion in absence or presence of PBO
