# Supplementary material for: Pyriproxyfen is metabolized by P450s associated with pyrethroid resistance in An. gambiae
Source: PubMed Central journal article supplement — Insect Biochem Mol Biol. 2016 Nov;78:50–7. doi: 10.1016/j.ibmb.2016.09.001 (PMC6399515; doi:10.1016/j.ibmb.2016.09.001), 2016-11
Supplement: mmc3.pdf [file mmc3.pdf]

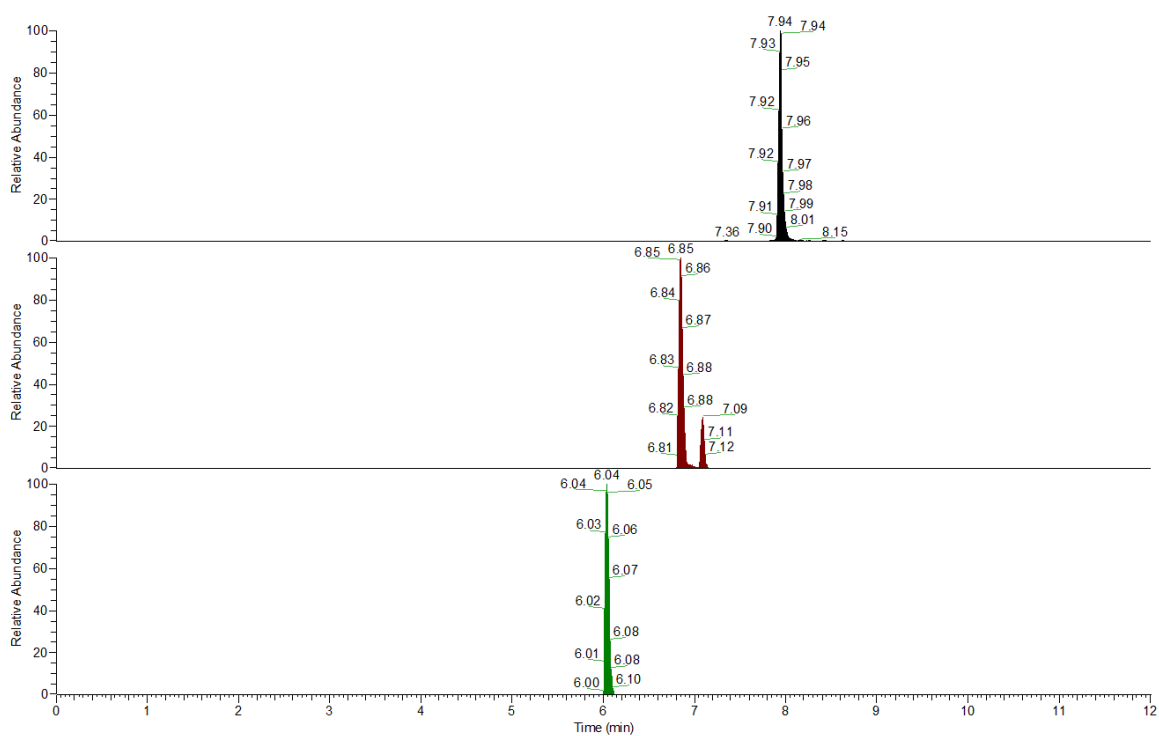

**Fig S3.** Extracted ion chromatograms of protonated PPF molecule (7.9 min) and its proposed metabolites (6.0 min, 6.9 min and 7.1 min) in CYP6P3.  $[M+H]^+$  corresponds to 322.1438 ( $m/z$ ) (top); 338.1387 ( $m/z$ ) (middle); 354.1336 ( $m/z$ ) (bottom).
